# Supplementary material
Source: HighWire-hosted journal article supplement (https://bmjopen.bmj.com/content/6/9/e010317)
Supplement: inline-supplementary-material-1 [file inline-supplementary-material-1.pdf]

## Interview Guide

### Improving institutional childbirth services in rural southern Tanzania: The healthcare workers' perspective

ID:

Interview date:

Interview start:

Interview end:

---

#### Socio-demographic information of participant

1. Place of residence:
2. Ethnicity:
3. Religion:
4. Education:
5. Main occupation:
6. Age:
7. Number of QI sessions attended:

- 
1. What do you understand by the term “quality improvement in maternal and neonatal health”?
  2. Do you remember key issues we discussed during our meetings (the learning sessions) in order to improve the quality of care for pregnant women and newborns? If yes, could you please explain them (Probe: use of PDSA cycle, use data, generate change ideas, follow up visits, maternal or newborn topics).
  3. What do you think about the learning sessions? What did you like about it? What could be improved?
  4. Do you remember key activities we did together during follow up visits in order to improve the quality of care for pregnant women and newborns? (Probe: look at data, process data and outcome, revise PDSA, revise what we learnt during LS, plot graphs, discuss change ideas)
  5. Which activity worked best during the QI implementation? Can you explain why?
  6. Which activity did not work during the QI implementation? Can you explain why?

7. Can you remember the change ideas (activities) you agreed on to implement in order to improve maternal and neonatal health services? (Probe: giving individual birth plan and complication preparedness counselling to all pregnant women attending ANC clinic, use of information brochure, keeping a register, attending village meetings, male involvement in counselling).
8. Did you manage to implement some of these change ideas? If yes, which ones?  
Do you continue them? If yes, why? If no, why not?  
Did the activities improve the quality of care for pregnant women and newborns in your facility? If yes, how? If no, why not? Please give examples.
9. During the implementation of your change ideas or QI activities were there any challenges you faced? What kind of challenges? Did you overcome them? How?
10. During the implementation of your QI activities or change ideas did you need any extra support from the district, project or your colleagues? If yes, from whom? What kind of support did you need? Did you get it?
11. Were you able to apply the PDSA cycle to improve other types of services? If yes, can you give an example? If no, why not?
12. Were you able to transfer the knowledge about it to anyone else?
13. Has the service provision at your health facility/ies changed after participating in this project?
14. How could the QI intervention be improved? Can you give examples?
15. Do you have anything you would like to add?
16. Would you like to ask me any questions?

---

**Additional question for the RCH ccordinator**

What was your contribution during the implementation of the QI activities?
